# Supplementary material
Source: publisher figshare collection journal article supplement (https://tandf.figshare.com/articles/dataset/_/22141181)
Supplement: Supplementary file 1 [file 1]

# Author Contributions Checklist Form

This form documents the artifacts associated with the article (i.e., the data and code supporting the computational findings) and describes how to reproduce the findings.

## Part 1: Data

☐ This paper **does not** involve analysis of external data (i.e., no data are used or the only data are generated by the authors via simulation in their code).

☒ I certify that the author(s) of the manuscript have legitimate access to and permission to use the data used in this manuscript.

## Abstract

Passerine Data: a collection of observations of 63 color-marked passerines, in which individual memberships in groups (individuals appearing together in a flock) were recorded.

Extended Bakery Data: a collection of purchases in a chain of bakery stores, which provide 50 items including 40 bakery goods and 10 drinks. Each purchase contains a collection of items bought together.

## Availability

☒ Data **are** publicly available

☐ Data **cannot be made** publicly available

If the data are publicly available, see the *Publicly available data* section. Otherwise, see the *Non-publicly available data* section, below.

## Publicly available data

☒ Data are available online at:

<https://www.sciencedirect.com/science/article/pii/S0003347215004480>

<http://users.csc.calpoly.edu/~dekhtyar/466-Spring2018/labs/lab01.html>

☐ Data are available as part of the paper's supplementary material.

☐ Data are publicly available by request, following the process described here:

☐ Data are or will be made available through some other mechanism, described here:

## Non-publicly available data

Discussion of lack of publicly available data:

## Description

### File format(s)

- ☒ CSV or other plain text:
- ☐ Software-specific binary format (.Rda, Python pickle, etc.):
- ☐ Standardized binary format (e.g., netCDF, HDF5, etc.):
- ☐ Other (described here):

### Data dictionary

- ☐ Provided by the authors in the following file(s):
- ☐ Data file(s) is (are) self-describing (e.g., netCDF files)
- ☒ Available at the following URL:

<https://www.sciencedirect.com/science/article/pii/S0003347215004480>;  
<http://users.csc.calpoly.edu/~dekhtyar/466-Spring2018/labs/lab01.html>

### Additional information (optional)

## Part 2: Code

### Abstract

The R code implements the EM algorithm for estimating the hubs and parameters in the hub model with and without a null component, and the modified EM algorithm for hub set selection in the hub model with an unknown hub set.

### Description

#### Code format(s)

- ☒ Script files
- ☒ R   ☐ Python   ☐ Matlab
  - ☐ Other:
- ☐ Package
- ☐ R   ☐ Python   ☐ MATLAB toolbox
  - ☐ Other:
- ☐ Reproducible report
- ☐ R Markdown   ☐ Jupyter notebook
  - ☐ Other:
- ☐ Shell script
- ☐ Other (described here):

### Supporting software requirements

Version of primary software used

R version 4.1.0

Libraries and dependencies used by the code

Rsolnp (version 1.16)

### Supporting system/hardware requirements (optional)

### Parallelization used

- ☐ No parallel code used
- ☒ Multi-core parallelization on a single machine/node  
Number of cores used: 10
- ☐ Multi-machine/multi-node parallelization  
Number of nodes and cores used:

### License

- ☐ MIT License (default)
- ☐ BSD
- ☒ GPL v3.0
- ☐ Creative Commons
- ☐ Other (described here):

### Additional information (optional)

## Part 3: Reproducibility workflow

### Scope

The provided workflow reproduces:

- ☐ Any numbers provided in text in the paper
- ☒ The computational method(s) presented in the paper (i.e., code is provided that implements the method(s))
- ☒ All tables and figures in the paper
- ☐ Selected tables and figures in the paper, as explained and justified here:

### Workflow details

#### Format(s)

- ☒ Single master code file
- ☐ Wrapper (shell) script(s)
- ☐ Self-contained R Markdown file, Jupyter notebook, or other literate programming approach
- ☐ Text file (e.g., a readme-style file) that documents workflow
- ☐ Makefile
- ☐ Other (more detail in 'Instructions' below)

#### Instructions

Run 'Onetable.R', which will produce a txt file, called 'OneTable.txt', including table1, table2, table 3 and all data analysis results in the manuscript.

### Expected run-time

Approximate time needed to reproduce the analyses on a standard desktop machine:

- ☐ <1 minute
- ☐ 1-10 minutes
- ☐ 10-60 minutes
- ☒ 1-8 hours

☐ >8 hours

☐ Not feasible to run on a desktop machine, as described here:

Additional documentation (optional)

Notes (optional)
